# Supplementary material for: Oxygenation vs iodonio substitution during the reactions of alkenylsilanes with iodosylbenzene: participation of the internal oxy group
Source: Royal Society of Chemistry journal article supplement (doi:10.1039/b615888a), 2007-01-01
Supplement: b615888a.pdf [file b615888a.pdf]

## Supplementary Information of

### Oxygenation vs iodonio substitution during the reactions of alkenylsilanes with iodosylbenzene: participation of the internal oxy group

Morifumi Fujita,\* Hee Jin Lee, Takashi Sugimura, and Tadashi Okuyama

*Graduate School of Material Science, Himeji Institute of Technology, University of Hyogo,*

*Kohto, Kamigori, Hyogo 678-1297, Japan*

*fuji@sci.u-hyogo.ac.jp*

#### CONTENTS:

|                                                                                                                          |     |
|--------------------------------------------------------------------------------------------------------------------------|-----|
| General Procedures and Characterization                                                                                  | 2–8 |
| <b>Figure S1.</b> $^{13}\text{C}$ NMR signals of $^{18}\text{O}$ - <b>3c</b>                                             | 9   |
| <b>Figure S2.</b> $^{13}\text{C}$ NMR signals of the ester carbonyl carbons in <b>3c</b> and $^{18}\text{O}$ - <b>3c</b> | 10  |
| <b>Figure S3.</b> $^{13}\text{C}$ NMR signals of $^{18}\text{O}$ - <b>4c</b>                                             | 11  |
| <b>Figure S4.</b> $^{13}\text{C}$ NMR signals of the ester carbonyl carbons in <b>4c</b> and $^{18}\text{O}$ - <b>4c</b> | 12  |

**General.** Proton and  $^{13}\text{C}$  NMR spectra were measured on a JEOL ECA-600 spectrometer as solutions in  $\text{CDCl}_3$ . Proton NMR spectra were recorded using the residual  $\text{CHCl}_3$  as an internal reference (7.24 ppm) and  $^{13}\text{C}$  NMR using  $\text{CDCl}_3$  as an internal reference (77.00 ppm). For mass spectra measurements was used JEOL JMS-T100LC. Iodosylbenzene and (diacetoxyiodo)benzene were obtained according to the literature method.<sup>S1</sup> Dichloromethane and  $\text{BF}_3\cdot\text{OEt}_2$  were purified by distillation over  $\text{CaH}_2$ .

**Preparation of (*E*)-alkenylsilanes, (*E*)-1.** (*E*)-1-(Triethylsilyl)-1-buten-4-ol and (*E*)-1-(triethylsilyl)-1-penten-5-ol have been prepared by stereoselective hydrosilylation using rhodium complex.<sup>9</sup> These (*E*)-alkenols were prepared according to the reported procedures,<sup>9</sup> and were converted to esters (*E*)-**1a-d**. (*E*)-Methyl 6-(triethylsilyl)hex-5-enoate ((*E*)-**1e**) was prepared via (*E*)-6-(triethylsilyl)hex-5-enoic acid, which was selectively prepared by the rhodium catalyzed hydrosilylation of hex-5-ynoic acid.

**(*E*)-5-(triethylsilyl)pent-4-enyl benzoate ((*E*)-1a).**  $\delta_{\text{H}}$ (600 MHz;  $\text{CDCl}_3$ ) 8.03 (2 H, d,  $J$  7.6), 7.54 (1 H, t,  $J$  7.6), 7.42 (2 H, t,  $J$  7.6), 6.05 (1 H, dt,  $J$  18.6 and 7.6), 5.61 (1 H, d,  $J$  18.6), 4.31 (2 H, t,  $J$  7.6), 2.27 (2 H, q,  $J$  7.6), 1.87 (2 H, quint,  $J$  7.6), 0.90 (9 H, t,  $J$  7.6) and 0.53 (6 H, q,  $J$  7.6);  $\delta_{\text{C}}$ (150 MHz;  $\text{CDCl}_3$ ) 166.58, 146.75, 132.79, 130.49, 129.55, 128.30, 127.11, 64.47, 33.28, 27.90, 7.33 and 3.50;  $m/z$  (ESI+) 327.1776 ( $\text{M} + \text{Na}$ .  $\text{C}_{18}\text{H}_{28}\text{O}_2\text{SiNa}$  requires 327.1756), 327 (100%).

**(*E*)-5-(triethylsilyl)pent-4-enyl acetate ((*E*)-1b).**  $\delta_{\text{H}}$ (600 MHz;  $\text{CDCl}_3$ ) 6.00 (1 H, dt,  $J$  18.0 and 7.2), 5.57 (1 H, dt,  $J$  18.0 and 1.2), 4.04 (2 H, t,  $J$  7.2), 2.17 (2 H, q,  $J$  7.2), 2.03 (3 H, s), 1.72 (2 H, quint,  $J$  7.2), 0.90 (9 H, t,  $J$  8.4) and 0.52 (6 H, q,  $J$  8.4);  $\delta_{\text{C}}$ (150 MHz;  $\text{CDCl}_3$ ) 171.12, 146.77, 126.98, 64.00, 33.13, 27.76, 20.96, 7.32 and 3.50;  $m/z$  (ESI+) 265.1603 ( $\text{M} + \text{Na}$ .  $\text{C}_{13}\text{H}_{26}\text{O}_2\text{SiNa}$  requires 265.1600), 265 (100%).

**(*E*)-4-(triethylsilyl)but-3-enyl benzoate ((*E*)-1c).**  $\delta_{\text{H}}$ (600 MHz;  $\text{CDCl}_3$ ) 8.01 (2 H, d,  $J$  7.6), 7.53 (1 H, t,  $J$  7.6), 7.41 (2 H, t,  $J$  7.6), 6.05 (1 H, dt,  $J$  18.6 and 6.4), 5.72 (1 H, dt,  $J$  18.6 and 1.4), 4.37 (2 H, t,  $J$  6.4), 2.57 (2 H, qd,  $J$  6.4 and 1.4), 0.89 (9 H, t,  $J$  8.2) and 0.53 (6 H, q,  $J$  8.2);  $\delta_{\text{C}}$ (150 MHz;  $\text{CDCl}_3$ ) 166.53, 143.02, 132.80, 130.44, 129.74, 129.55, 128.26, 63.83, 36.25, 7.28 and 3.41;  $m/z$  (ESI+) 313.1578 ( $\text{M} + \text{Na}$ .  $\text{C}_{17}\text{H}_{26}\text{O}_2\text{SiNa}$  requires 313.1600), 313 (100%).

**(*E*)-4-(triethylsilyl)but-3-enyl acetate ((*E*)-1d).**  $\delta_{\text{H}}$ (600 MHz;  $\text{CDCl}_3$ ) 5.95 (1 H, dt,  $J$  18.6 and 6.9), 5.65 (1 H, dt,  $J$  18.6 and 1.4), 4.11 (2 H, t,  $J$  6.9), 2.43 (2 H, qd,  $J$  6.9 and 1.4), 2.01 (3 H, s), 0.90 (9 H, t,  $J$  8.2) and 0.53 (6 H, q,  $J$  8.2);  $\delta_{\text{C}}$ (150 MHz;  $\text{CDCl}_3$ ) 171.07, 142.94, 129.54, 63.43, 36.09, 20.90, 7.29 and 3.41;  $m/z$  (ESI+) 251.1423 ( $\text{M} + \text{Na}$ .  $\text{C}_{12}\text{H}_{24}\text{O}_2\text{SiNa}$  requires 251.1443), 251 (100%).

**(*Z*)-4-(triethylsilyl)but-3-enyl benzoate ((*Z*)-1c).** The titled compound was prepared by hydrosilylation of but-3-ynyl benzoate using Grubbs' catalyst as reported.<sup>10</sup> The reaction gave a mixture of (*Z*)-**1c** and 3-(triethylsilyl)but-3-enyl benzoate (73 : 27). Proton NMR spectra of these

products agree well with the reported data.<sup>10</sup>

**(Z)-4-(triethylsilyl)but-3-enyl acetate ((Z)-1d).** The titled compound was prepared by the Grubbs' catalyst-mediated hydrosilylation of but-3-ynyl acetate. The reaction gave a mixture of (Z)-1d and 3-(triethylsilyl)but-3-enyl acetate (67 : 33). Selected data for (Z)-2d:  $\delta_{\text{H}}$ (600 MHz;  $\text{CDCl}_3$ ) 6.32 (1 H, dt,  $J$  13.7 and 6.9), 5.55 (1 H, dt,  $J$  13.7, and 1.4), 4.09 (2 H, t,  $J$  6.9), 2.43 (2 H, qd,  $J$  6.9 and 1.4), 2.03 (3 H, s), 0.93 (9 H, t,  $J$  7.6) and 0.61 (6 H, q,  $J$  7.6).

**(E)-methyl 6-(triethylsilyl)hex-5-enoate ((E)-1e).**  $\delta_{\text{H}}$ (600 MHz;  $\text{CDCl}_3$ ) 5.96 (1 H, dt,  $J$  18.6 and 6.9), 5.54 (1 H, d,  $J$  18.6), 3.64 (3 H, s), 2.27 (2 H, t,  $J$  6.9), 2.13 (2 H, q,  $J$  6.9), 1.71 (2 H, quint,  $J$  6.9), 0.89 (9 H, t,  $J$  8.2) and 0.51 (6 H, q,  $J$  8.2);  $\delta_{\text{C}}$ (150 MHz;  $\text{CDCl}_3$ ) 174.05, 146.97, 127.11, 51.40, 36.19, 33.33, 23.95, 7.31 and 3.48.

**Reaction of (E)-1a.** To a solution of (E)-1a (101 mg, 0.33 mmol) and iodosylbenzene (109 mg, 0.49 mmol) in dichloromethane (3 mL) was added  $\text{BF}_3\cdot\text{OEt}_2$  (0.06 mL, 0.49 mmol) at 0 °C, and the mixture was stirred for 40 min at 0 °C. After the addition of an aqueous solution of sodium tetrafluoroborate, the mixture was stirred for a few min at 0 °C. Extraction with dichloromethane, filtration, and then concentration gave a crude oil, which was washed several times with hexane-dichloromethane to give 2a (108 mg, 0.225 mmol, 68% yield), which was a mixture of 92:8 of (E)-2a and (Z)-2a. The  $^1\text{H}$  NMR spectra of (E)-2a and (Z)-2a agree well with the reported values.<sup>8</sup>

**Reaction of (E)-1b.** To a solution of (E)-1b (100 mg, 0.41 mmol) and iodosylbenzene (137 mg, 0.62 mmol) in dichloromethane (3.5 mL) was added  $\text{BF}_3\cdot\text{OEt}_2$  (0.08 mL, 0.6 mmol) at 0 °C, and the mixture was stirred for 20 min at 0 °C. After the addition of an aqueous solution of sodium tetrafluoroborate, the mixture was stirred for a few min at 0 °C. Extraction with dichloromethane, filtration, and then concentration gave a crude oil, which was washed several times with hexane-dichloromethane to give (E)-2b (92 mg, 0.22 mmol, 54% yield). Selected data for (E)-2b:  $\delta_{\text{H}}$ (600 MHz;  $\text{CDCl}_3$ ) 8.00 (2 H, d,  $J$  7.8), 7.64 (1 H, t,  $J$  7.8), 7.49 (2 H, t,  $J$  7.8), 7.01 (1 H, dt,  $J$  13.8 and 6.6), 6.85 (1 H, d,  $J$  13.8), 4.03 (2 H, t,  $J$  6.6), 2.42 (2 H, q,  $J$  6.6); 2.00 (3 H, s) and 1.81 (2 H, quint,  $J$  6.6);  $\delta_{\text{C}}$ (150 MHz;  $\text{CDCl}_3$ ) 171.24, 153.66, 135.73, 132.84, 132.48, 109.41, 97.63, 62.87, 31.68, 26.58 and 20.83;  $m/z$  (ESI+) 331.0229 ( $\text{M} - \text{BF}_4$ .  $\text{C}_{13}\text{H}_{16}\text{O}_2\text{I}$  requires 331.0195), 331 (100%).

**Reaction of (E)-1c.** To a solution of (E)-1c (373 mg, 1.28 mmol) and iodosylbenzene (340 mg, 1.54 mmol) in dichloromethane (5.1 mL) was added  $\text{BF}_3\cdot\text{OEt}_2$  (0.19 mL, 1.54 mmol) at -40 °C, and the mixture was stirred for 100 min at -40 °C. The mixture was quenched by  $\text{NaBF}_4$  aqueous solution, and extracted with dichloromethane. The organic extracts were concentrated in vacuo, and purified by the  $\text{SiO}_2$  column chromatography (eluent: 10% EtOAc in hexane) to give 3c (222 mg, 0.72 mmol, 56% yield), *cis*-4c (24 mg, 0.078 mmol, 6% yield), and 5c (8 mg, 0.04 mmol, 3% yield). Selected data for

4-(triethylsilyl)-3-oxobutyl benzoate (**3c**):  $\delta_{\text{H}}$ (600 MHz;  $\text{CDCl}_3$ ) 7.98 (2 H, d,  $J$  7.6), 7.52 (1 H, t,  $J$  7.6), 7.39 (2 H, t,  $J$  7.6), 4.55 (2 H, t,  $J$  6.2), 2.81 (2 H, t,  $J$  6.2), 2.25 (2 H, s), 0.93 (9 H, t,  $J$  7.6) and 0.61 (6 H, q,  $J$  7.6);  $\delta_{\text{C}}$ (150 MHz;  $\text{CDCl}_3$ ) 206.25, 166.45, 132.90, 130.14, 129.57, 128.28, 60.02, 43.02, 33.53, 7.07 and 3.71;  $\nu_{\text{max}}$  (film)/ $\text{cm}^{-1}$  2954, 1722, 1692, 1277, 1116, 1025 and 711;  $m/z$  (ESI+) 329.1559 ( $\text{M} + \text{Na}$ .  $\text{C}_{17}\text{H}_{26}\text{O}_3\text{SiNa}$  requires 329.1549), 329 (100). Selected data for *cis*-2-(triethylsilyl)-tetrahydrofuran-3-yl benzoate (*cis*-**4c**):  $\delta_{\text{H}}$ (600 MHz;  $\text{CDCl}_3$ ) 8.02 (2 H, d,  $J$  7.6), 7.55 (1 H, t,  $J$  7.6), 7.43 (2 H, t,  $J$  7.6), 5.81 (1 H, ddd,  $J$  5.5, 4.1 and 1.4), 4.03 (1 H, q,  $J$  8.2), 3.76 (1 H, td,  $J$  8.2 and 5.5), 3.47 (1 H, d,  $J$  4.1), 2.35 (1 H, m), 2.01 (1 H, m), 0.97 (9 H, t,  $J$  7.6), 0.70 (3 H, dq,  $J$  15.2 and 7.6) and 0.64 (3 H, dq,  $J$  15.2 and 7.6);  $\delta_{\text{C}}$ (150 MHz;  $\text{CDCl}_3$ ) 166.36, 133.00, 130.43, 129.63, 128.39, 78.78, 74.86, 67.76, 35.74, 7.49 and 2.92;  $\nu_{\text{max}}$  (film)/ $\text{cm}^{-1}$  2953, 2875, 1717, 1272, 1109 and 712;  $m/z$  (ESI+) 329.1540 ( $\text{M} + \text{Na}$ .  $\text{C}_{17}\text{H}_{26}\text{O}_3\text{SiNa}$  requires 329.1549), 329 (100%).

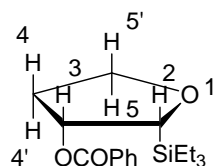

#### Key HMBC Correlations of *cis*-**4c**

| Position                 | $\delta_{\text{H}}$ (ppm) | carbon no. (ppm)                             |
|--------------------------|---------------------------|----------------------------------------------|
| 5                        | 4.03                      | C-4 (35.74), C-2 (74.86), C-3 (78.78)        |
| 5'                       | 3.76                      | C-4 (35.74), C-2 (74.86), C-3 (78.78)        |
| 3                        | 5.81                      | C-2 (74.86), C-5 (67.76), C=O (166.36)       |
| 2                        | 3.47                      | C-3 (78.78)                                  |
| 4                        | 2.35                      | C-5 (67.76), C-2 (74.86)                     |
| 4'                       | 2.01                      | C-2 (74.86), C-3 (78.78)                     |
| $\text{SiCH}_2\text{Me}$ | 0.70, 0.64                | C-2 (74.86), $\text{SiCH}_2\text{Me}$ (7.49) |

#### Key NOE of *cis*-**4c**

| Position | $\delta_{\text{H}}$ (ppm) | proton no. (ppm)                     |
|----------|---------------------------|--------------------------------------|
| 2        | 3.47                      | H-3 (5.81), H-5' (3.76)              |
| 3        | 5.81                      | H-4 (2.35), H-2 (3.47)               |
| 4        | 2.35                      | H-4' (2.01), H-5' (3.76), H-3 (5.81) |
| 5'       | 3.76                      | H-4 (2.35), H-2 (3.47), H-5 (4.03)   |
| 5        | 4.03                      | H-4' (2.01), H-5' (3.76)             |

**Reaction of (Z)-**1c**.** A 73:27 mixture of (Z)-**1c** : 3-(triethylsilyl)but-3-enyl benzoate (**1c'**) was employed for the reaction with iodosylbenzene. To a solution of the mixture of **1c** and **1c'** (200 mg, 0.69 mmol) and iodosylbenzene (182 mg, 0.83 mmol) in dichloromethane (2.8 mL) was added  $\text{BF}_3 \cdot \text{OEt}_2$  (0.1 mL, 0.81 mmol) at  $-40^\circ\text{C}$ , and the mixture was stirred for 130 min at  $-40^\circ\text{C}$ . The mixture was

quenched by NaBF<sub>4</sub> aqueous solution, and extracted with dichloromethane. The organic extracts were concentrated in vacuo. Proton NMR analysis of the crude products indicated that ratio of (*Z*)-**1c**/**1c'**/**2c**/**3c**/*cis*-**4c**/*trans*-**4c**/**5c** was 0/17/0/67/0/10/6. Thus, only the isomeric substrate **1c'** was recovered. The cured products were purified by the SiO<sub>2</sub> column chromatography (eluent: 10% EtOAc in hexane) to give **3c** (68 mg, 0.22 mmol, 32% yield), and *trans*-**4c** (9 mg, 0.030mmol, 4% yield). Selected data for *trans*-2-(triethylsilyl)tetrahydrofuran-3-yl benzoate (*trans*-**4c**):  $\delta_H$ (600 MHz; CDCl<sub>3</sub>) 8.01 (2 H, d, *J* 7.6), 7.55 (1 H, t, *J* 7.6), 7.42 (2 H, t, *J* 7.6), 5.52 (1 H, ddd, *J* 6.2, 4.1 and 2.1), 4.01 (1 H, td, *J* 8.2 and 2.1), 3.75 (1 H, ddd, *J* 11.0, 8.2 and 5.5), 3.71 (1 H, d, *J* 4.1), 2.13 (1 H, dddd, *J* 13.7, 11.0, 8.2 and 6.2), 2.07 (1 H, ddt, *J* 13.7, 5.5 and 2.1), 0.98 (9 H, t, *J* 8.2), 0.65 (3 H, dq, *J* 15.2 and 8.2) and 0.64 (3 H, dq, *J* 15.2 and 8.2);  $\delta_C$ (150 MHz; CDCl<sub>3</sub>) 166.15, 133.00, 130.31, 129.56, 128.37, 77.17, 75.84, 67.67, 35.22, 7.37 and 1.89;  $\nu_{max}$  (film)/cm<sup>-1</sup> 2954, 2875, 1718, 1273, 1113 and 712; *m/z* (ESI+) 329.1526 (M + Na. C<sub>17</sub>H<sub>26</sub>O<sub>3</sub>SiNa requires 329.1549), 329 (100%).

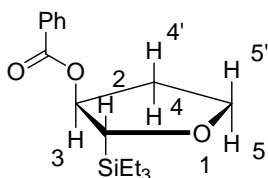

#### Key HMBC Correlations of *trans*-**4c**

| Position             | $\delta_H$ (ppm) | carbon no. (ppm)                         |
|----------------------|------------------|------------------------------------------|
| 5                    | 4.01             | C-3 (77.17), C-2 (75.84), C-4 (35.22)    |
| 3                    | 5.52             | C-2 (75.84), C-5 (67.67)                 |
| 2                    | 3.71             | C-3 (77.17)                              |
| 4                    | 2.13             | C-5 (67.67)                              |
| 4'                   | 2.07             | C-3 (77.17)                              |
| SiCH <sub>2</sub> Me | 0.65, 0.64       | C-2 (75.84), SiCH <sub>2</sub> Me (7.37) |

#### Key NOE of *trans*-**4c**

| Position | $\delta_H$ (ppm) | proton no. (ppm)                              |
|----------|------------------|-----------------------------------------------|
| 5        | 4.01             | H-4 (2.13), H-5' (3.75)                       |
| 5'       | 3.75             | H-4' (2.07), H-5 (4.01)                       |
| 3        | 5.52             | H-4 (2.13), SiCH <sub>2</sub> Me (0.65, 0.64) |
| 2        | 3.71             | SiCH <sub>2</sub> Me (0.65, 0.64)             |

**Reaction of (*E*)-**1d**.** To a solution of (*E*)-**1d** (293 mg, 1.28 mmol) and iodosylbenzene (339 mg, 1.54 mmol) in dichloromethane (5.1 mL) was added BF<sub>3</sub>·OEt<sub>2</sub> (0.19 mL, 1.54 mmol) at -40 °C, and the mixture was stirred for 66 min at -40 °C. The mixture was quenched by NaBF<sub>4</sub> aqueous solution, and

extracted with dichloromethane. The organic extracts were concentrated in vacuo, and purified by the SiO<sub>2</sub> column chromatography (eluent: 20% EtOAc in hexane) to give **3d** (67 mg, 0.26 mmol, 21% yield) and *cis*-**4d** (130 mg, 0.53 mmol, 42% yield). Selected data for 4-(triethylsilyl)-3-oxobutyl acetate (**3d**):  $\delta_{\text{H}}$ (600 MHz; CDCl<sub>3</sub>) 4.26 (2 H, t, *J* 6.2), 2.64 (2 H, t, *J* 6.2), 2.18 (2 H, s), 1.96 (3 H, s), 0.92 (9 H, t, *J* 8.2) and 0.58 (6 H, q, *J* 8.2);  $\delta_{\text{C}}$ (150 MHz; CDCl<sub>3</sub>) 206.23, 170.76, 59.45, 42.75, 33.48, 20.74, 7.00 and 3.62;  $\nu_{\text{max}}$  (film)/cm<sup>-1</sup> 2955, 1742, 1695, 1241, 1019 and 730; *m/z* (ESI+) 267.1416 (M + Na. C<sub>12</sub>H<sub>24</sub>O<sub>3</sub>SiNa requires 267.1392), 267 (100%). Selected data for *cis*-2-(triethylsilyl)-tetrahydrofuran-3-yl acetate (*cis*-**4d**):  $\delta_{\text{H}}$ (600 MHz; CDCl<sub>3</sub>) 5.41 (1 H, ddd, *J* 5.5, 4.1 and 1.4), 3.91 (1 H, q, *J* 8.2), 3.64 (1 H, td, *J* 8.2 and 5.5), 3.33 (1 H, d, *J* 4.1), 2.23 (1 H, m), 2.00 (3 H, s), 1.87 (1 H, m), 0.94 (9 H, t, *J* 7.6), 0.64 (3 H, dq, *J* 15.2 and 7.6) and 0.59 (3 H, dq, *J* 15.2 and 7.6);  $\delta_{\text{C}}$ (150 MHz; CDCl<sub>3</sub>) 170.47, 78.25, 74.65, 67.67, 35.44, 21.25, 7.39 and 2.87;  $\nu_{\text{max}}$  (film)/cm<sup>-1</sup> 2953, 2876, 1739, 1243 and 1022; *m/z* (ESI+) 267.1421 (M + Na. C<sub>12</sub>H<sub>24</sub>O<sub>3</sub>SiNa requires 267.1392), 267 (100%).

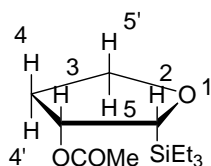

#### Key HMBC Correlations of *cis*-**4d**

| Position             | $\delta_{\text{H}}$ (ppm) | carbon no. (ppm)                          |
|----------------------|---------------------------|-------------------------------------------|
| 3                    | 5.41                      | C-2 (74.65), C-5 (67.67), C=O (170.47)    |
| 5                    | 3.91                      | C-4 (35.44), C-2 (74.65), C-3 (78.25)     |
| 5'                   | 3.64                      | C-4 (35.44), C-2 (74.65), C-3 (78.25)     |
| 2                    | 3.33                      | SiCH <sub>2</sub> Me (2.87), C-3 (78.25), |
| 4                    | 2.23                      | C-5 (67.67), C-2 (74.65)                  |
| 4'                   | 1.87                      | C-5 (67.67), C-2 (74.65), C-3 (78.25)     |
| SiCH <sub>2</sub> Me | 0.64, 0.59                | C-2 (74.65), SiCH <sub>2</sub> Me (7.39)  |

#### Key NOE of *cis*-**4d**

| Position | $\delta_{\text{H}}$ (ppm) | proton no. (ppm)                     |
|----------|---------------------------|--------------------------------------|
| 3        | 5.41                      | H-4 (2.23), H-2 (3.33)               |
| 5        | 3.91                      | H-4' (1.87), H-5' (3.64)             |
| 5'       | 3.64                      | H-4 (2.23), H-2 (3.33), H-5 (3.91)   |
| 2        | 3.33                      | H-3 (5.41), H-5' (3.64), H-4 (2.23)  |
| 4        | 2.23                      | H-4' (1.87), H-5' (3.64), H-3 (5.41) |

**Reaction of (Z)-**1d**.** A 67:33 mixture of (Z)-**1d** : 3-(triethylsilyl)but-3-enyl acetate (**1d'**) was employed for the reaction with iodosylbenzene. To the mixture of (Z)-**1d** and **1d'** (210 mg, 0.92 mmol)

and iodosylbenzene (243 mg, 1.10 mmol) in dichloromethane (3.7 mL) was added  $\text{BF}_3 \cdot \text{OEt}_2$  (0.14 mL, 1.14 mmol) at  $-40^\circ\text{C}$ , and the mixture was stirred for 70 min at  $-40^\circ\text{C}$ . The mixture was quenched by  $\text{NaBF}_4$  aqueous solution, and extracted with dichloromethane. The organic extracts were concentrated in vacuo. Proton nmr analysis of the crude products indicated that ratio of (*Z*)-**1d**/**1d'**/**2d**/**3d**/*cis*-**4d**/*trans*-**4d** was 0/27/0/29/0/44. Thus, only the isomeric substrate **1d'** was recovered. The cured products were purified by the  $\text{SiO}_2$  column chromatography (eluent: 10% EtOAc in hexane) to give **3d** (29 mg, 0.12 mmol, 13% yield) and *trans*-**4d** (49 mg, 0.20 mmol, 22% yield). Selected data for *trans*-2-(triethylsilyl)tetrahydrofuran-3-yl acetate (*trans*-**4d**):  $\delta_{\text{H}}$  (600 MHz;  $\text{CDCl}_3$ ) 5.25 (1 H, ddd,  $J$  6.2, 4.1 and 1.4), 3.93 (1 H, t,  $J$  8.2), 3.64 (1 H, ddd,  $J$  11.0, 8.2 and 6.2), 3.52 (1 H, d,  $J$  4.1), 2.01 (3 H, s), 1.99 (1 H, m), 1.90 (1 H, m), 0.95 (9 H, t,  $J$  7.6), 0.60 (3 H, q,  $J$  7.6) and 0.59 (3 H, q,  $J$  7.6);  $\delta_{\text{C}}$  (150 MHz;  $\text{CDCl}_3$ ) 170.66, 76.52, 75.72, 67.49, 34.98, 21.21, 7.30 and 1.84;  $\nu_{\text{max}}$  (film)/ $\text{cm}^{-1}$  2954, 2876, 1741, 1242 and 1017;  $m/z$  (ESI+) 267.1389 ( $\text{M} + \text{Na}$ .  $\text{C}_{12}\text{H}_{24}\text{O}_3\text{SiNa}$  requires 267.1392), 267 (100%).

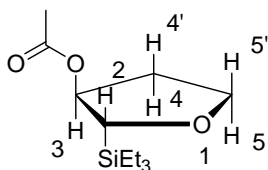

#### Key NOE of *trans*-**4d**

| Position | $\delta_{\text{H}}$ (ppm) | proton no. (ppm)                                                         |
|----------|---------------------------|--------------------------------------------------------------------------|
| 5        | 3.93                      | H-5' (3.64), H-4 or Ac (1.99 or 2.01)                                    |
| 5'       | 3.64                      | H-5 (3.93), H-4' (1.90)                                                  |
| 3        | 5.25                      | H-4 or Ac (1.99 or 2.01), $\text{SiCH}_2\text{Me}$ (0.60, 0.59)          |
| 2        | 3.52                      | $\text{SiCH}_2\text{Me}$ (0.60, 0.59), $\text{SiCH}_2\text{CH}_3$ (0.95) |

**Reaction of (*E*)-**1e**.** To a solution of (*E*)-**1e** (311 mg, 1.28 mmol) and iodosylbenzene (340 mg, 1.54 mmol) in dichloromethane (5.1 mL) was added  $\text{BF}_3 \cdot \text{OEt}_2$  (0.19 mL, 1.54 mmol) at  $-40^\circ\text{C}$ , and the mixture was stirred for 40 min at  $-40^\circ\text{C}$ . The mixture was quenched by  $\text{NaBF}_4$  aqueous solution, and extracted with dichloromethane. The organic extracts were concentrated in vacuo, and purified by the  $\text{SiO}_2$  column chromatography (eluent: 20% EtOAc in hexane) to give **3e** (119 mg, 0.46 mmol, 36% yield) and **5e** (21 mg, 0.14 mmol, 11% yield). Selected data for methyl 6-(triethylsilyl)-5-oxohexanoate (**3e**):  $\delta_{\text{H}}$  (600 MHz;  $\text{CDCl}_3$ ) 3.63 (3 H s), 2.40 (2 H, t,  $J$  7.2), 2.31 (2 H, t,  $J$  7.2), 2.15 (2 H, s), 1.84 (2 H, quint,  $J$  7.2), 0.92 (9 H, t,  $J$  8.2) and 0.58 (6 H, q,  $J$  8.2);  $\delta_{\text{C}}$  (150 MHz;  $\text{CDCl}_3$ ) 208.77, 173.64, 51.44, 43.12, 33.10, 33.02, 19.16, 7.06 and 3.68;  $\nu_{\text{max}}$  (film)/ $\text{cm}^{-1}$  2953, 2877,

1740, 1692, 1199, 1017 and 731;  $m/z$  (ESI+) 281.1564 ( $M + Na$ .  $C_{13}H_{26}O_3SiNa$  requires 281.1549), 281 (100%).

**Reaction of (*E*)-1c with iodosylbenzene in the presence of  $H_2^{18}O$ .** Labeled water  $H_2^{18}O$  (99 atom %) (0.05 mL) was added to iodosylbenzene (182 mg, 0.83 mmol), and the sample was dried overnight under reduced pressure. To the sample of iodosylbenzene were added (*E*)-1c (200 mg, 0.69 mmol),  $H_2^{18}O$  (99 atom %) (0.10 mL), and dichloromethane (2.8 mL). The suspension was cooled at  $-40\text{ }^\circ\text{C}$ , and then  $BF_3 \cdot OEt_2$  (0.20 mL, 1.63 mmol) was added to the suspension. After stirring for 2 h at  $-40\text{ }^\circ\text{C}$ , the mixture was quenched by normal water, and extracted with dichloromethane. The organic extracts were concentrated in vacuo, and purified by the  $SiO_2$  column chromatography (eluent: 10% EtOAc in hexane) to give **3c** (30.4 mg, 0.10 mmol, 14% yield) and *cis*-**4c** (103 mg, 0.34 mmol, 49% yield).

In ESI-MS analysis, **3c** has  $m/z = 329$  ( $M + Na$ ) and 331 peaks in 50 and 100% relative intensities in comparison with 100 and 7% for those of the normal product. The  $^{18}O$  content is roughly estimated to be 60% ( $= 100/(50+100) - 7/(100 + 7)$ ). For  $^{13}C$  NMR (150 MHz) measurement of the labeled **3c**, a strong signal at 166.40 ppm and a weak signal at 166.44 ppm were observed in comparison with single signal at 166.45 ppm for the normal **3c** as shown in Fig. S1 and S2. The other carbon signals were the same as those for the normal **3c**. These results indicate that the  $^{18}O$  atom is incorporated at the ester carbonyl group.

In ESI-MS analysis, *cis*-**4c** has  $m/z = 329$  ( $M + Na$ ) and 331 peaks in 48 and 100% relative intensities in comparison with 100 and 3% for those of the normal product. The  $^{18}O$  content is roughly estimated to be 65% ( $= 100/(48+100) - 3/(100 + 3)$ ). For  $^{13}C$  NMR (150 MHz) measurement of the labeled **4c**, a strong signal at 166.31 ppm and a weak signal at 166.35 ppm were observed in comparison with single signal at 166.36 ppm for the normal *cis*-**4c**. The other carbon signals were the same as those for the normal *cis*-**4c** as shown in Fig. S3 and S4. These results indicate that the  $^{18}O$  atom is incorporated at the ester carbonyl group.

## References

(S1) H. Saltzmann and J. G. Sharefkin, *Org. Synth.*, 1973, **Coll. 5**, 658.

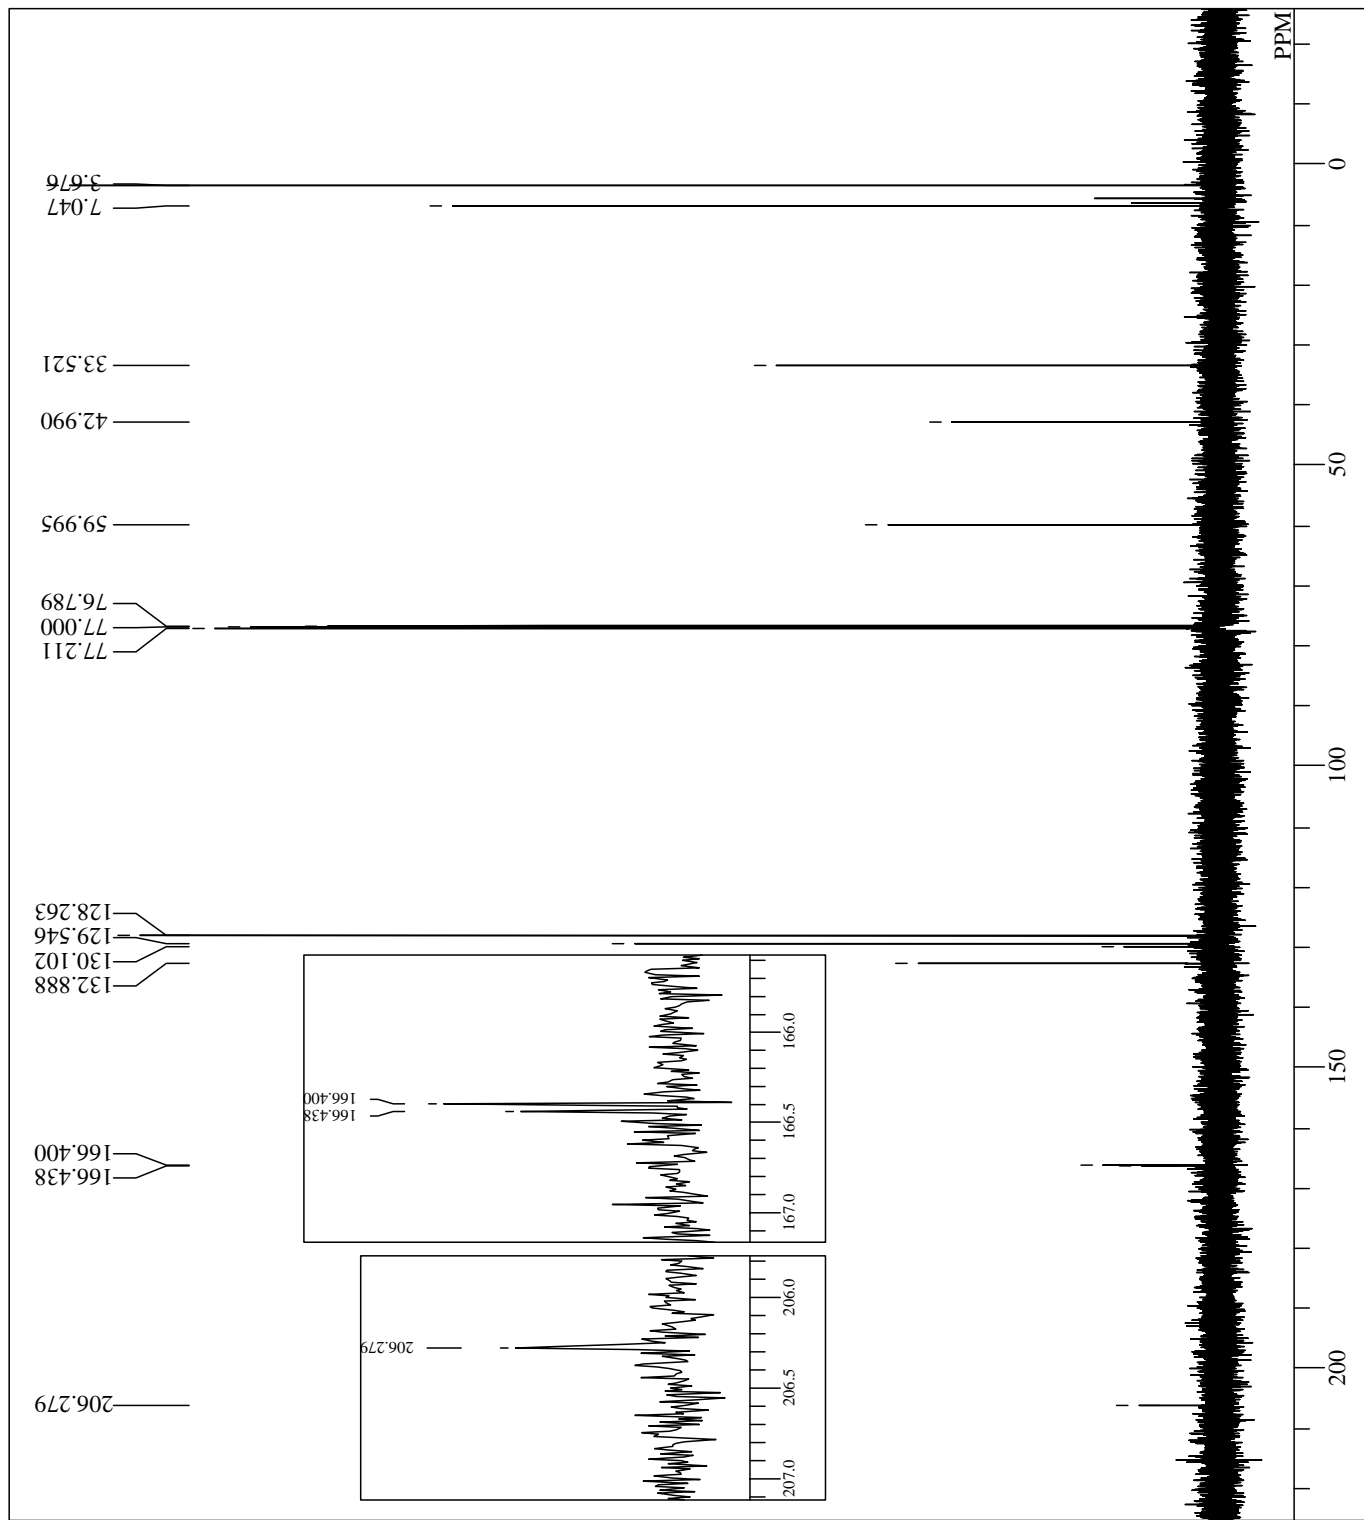

**Fig. S1**  $^{13}\text{C}$  NMR (150 MHz in  $\text{CDCl}_3$ ) signals of  $^{18}\text{O}$ -**3c**

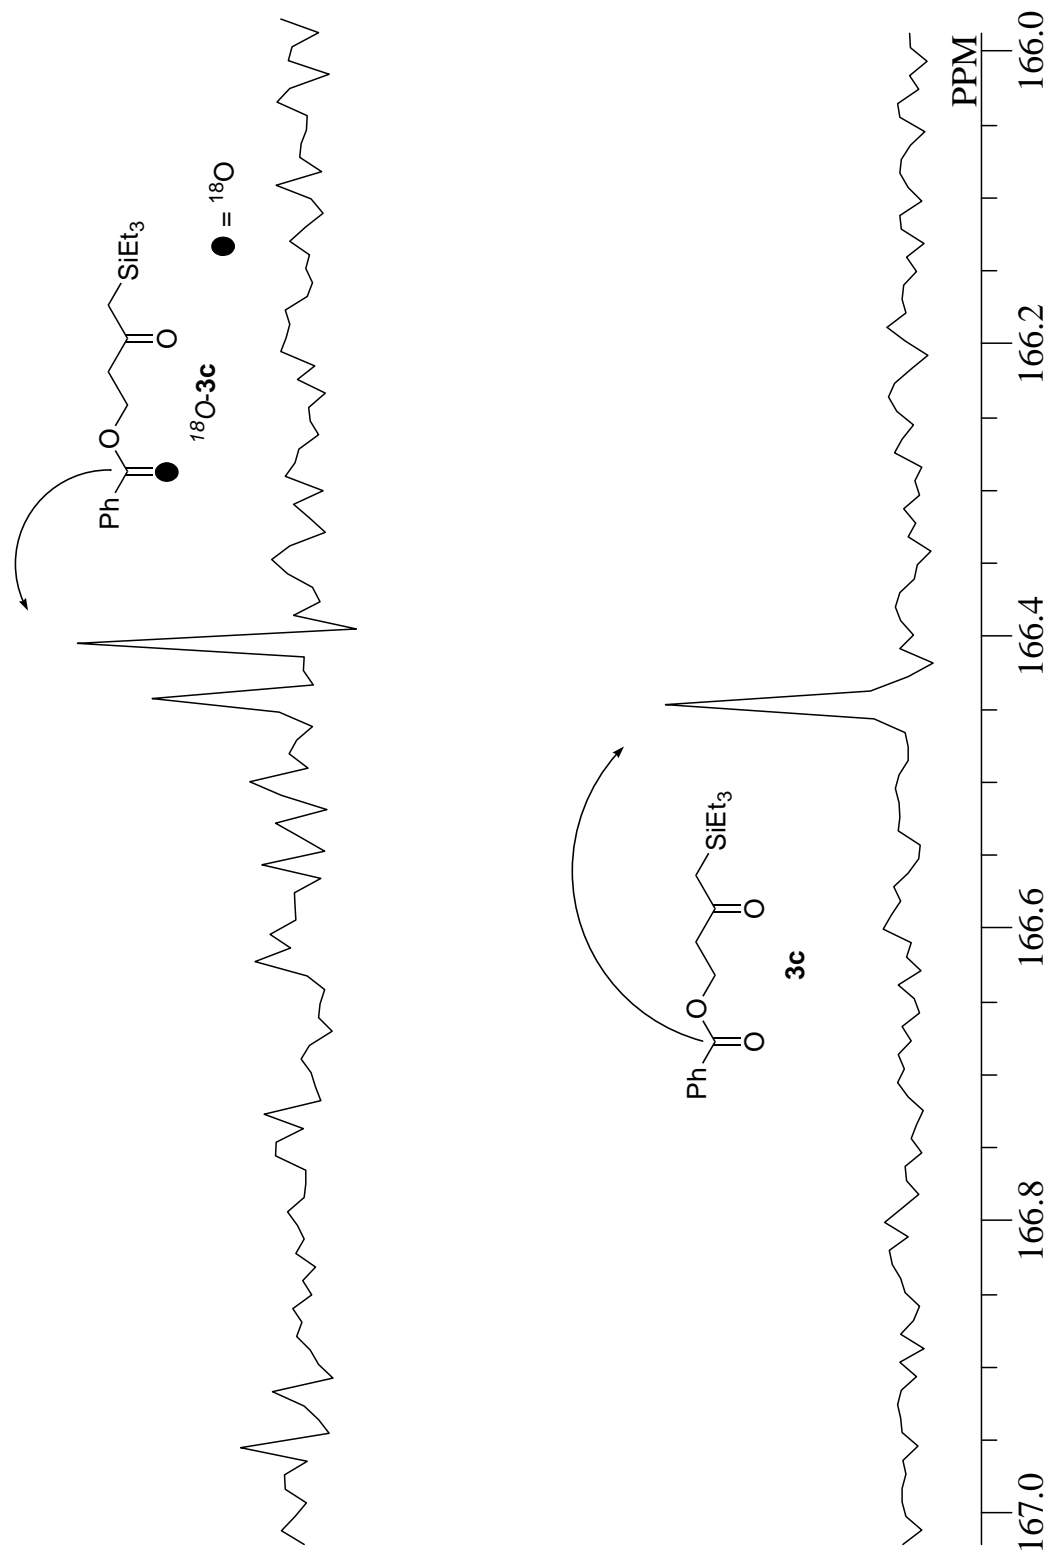

**Fig. S2**  $^{13}\text{C}$  NMR (150 MHz in  $\text{CDCl}_3$ ) signals of the ester carbonyl carbons in **3c** and  $^{18}\text{O}$ -**3c**

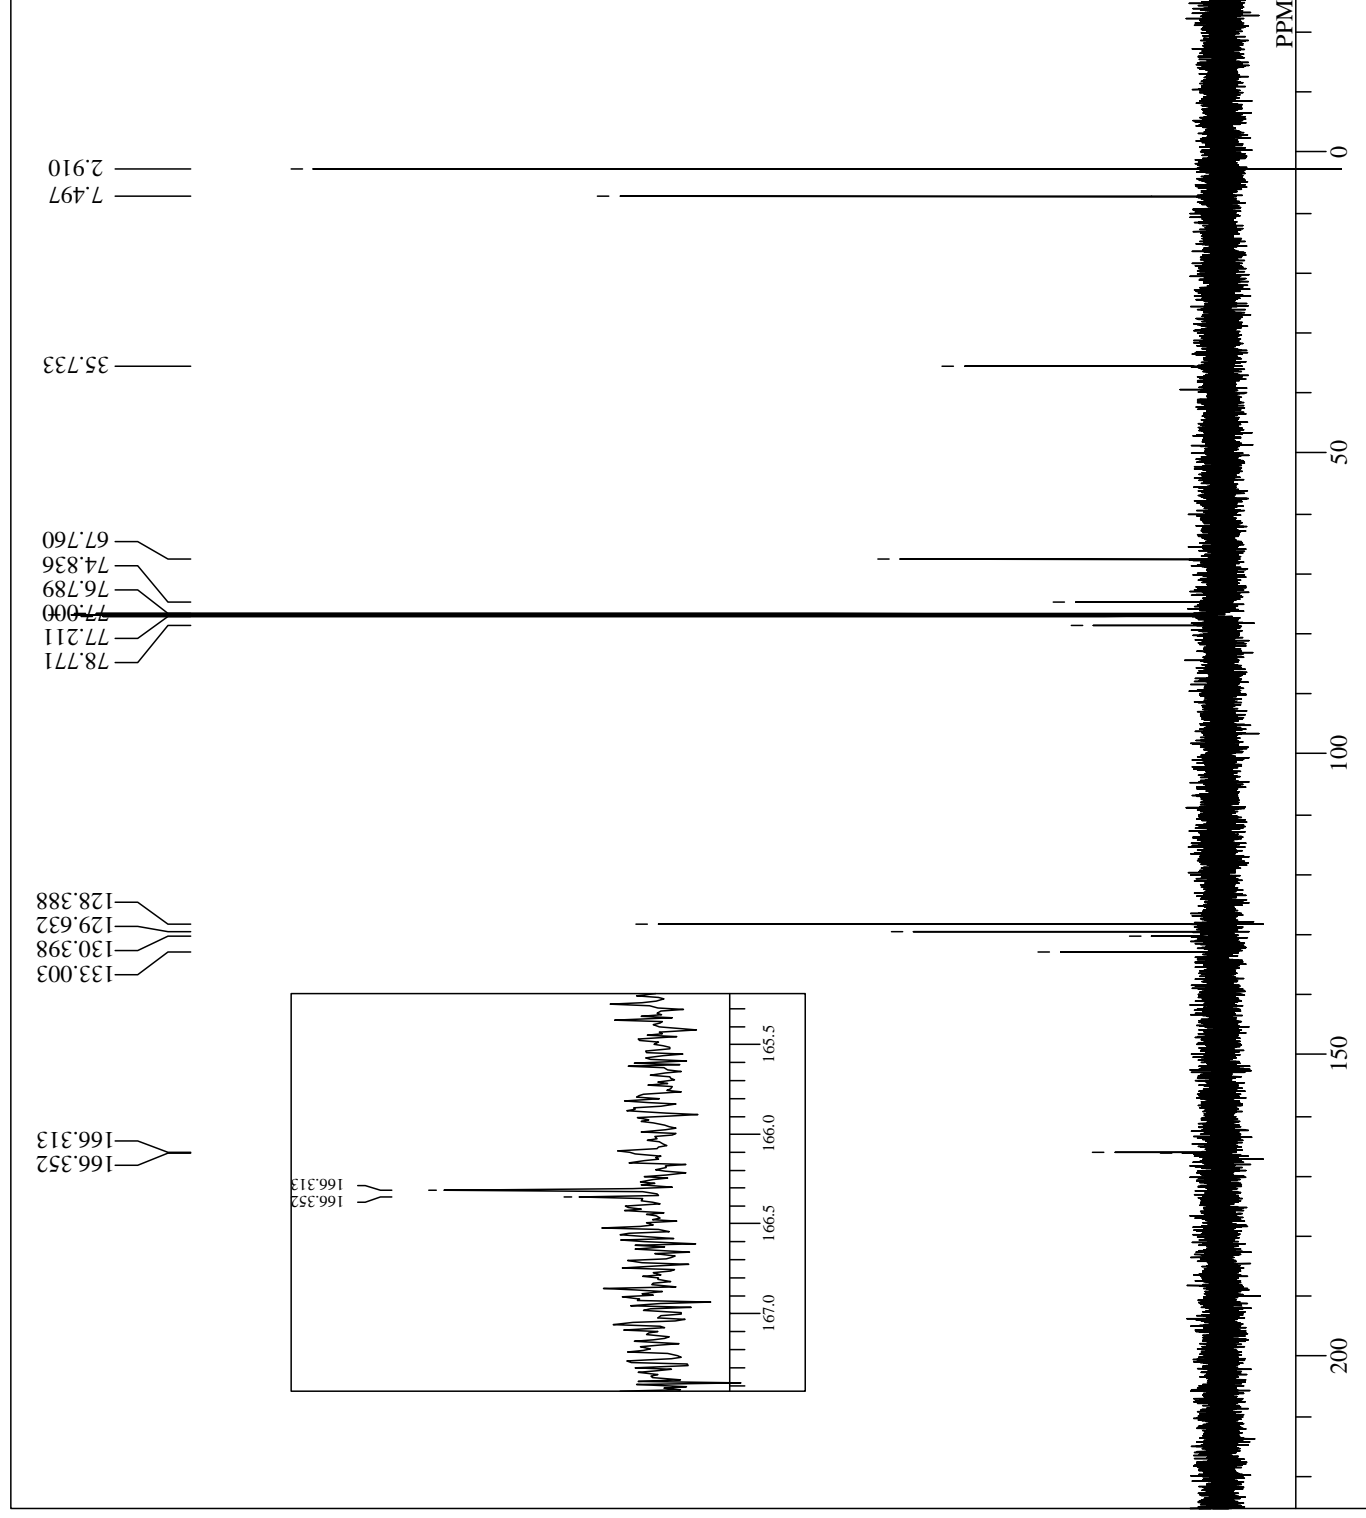

**Fig. S3**  $^{13}\text{C}$  NMR (150 MHz in  $\text{CDCl}_3$ ) signals of  $^{18}\text{O}$ -4c

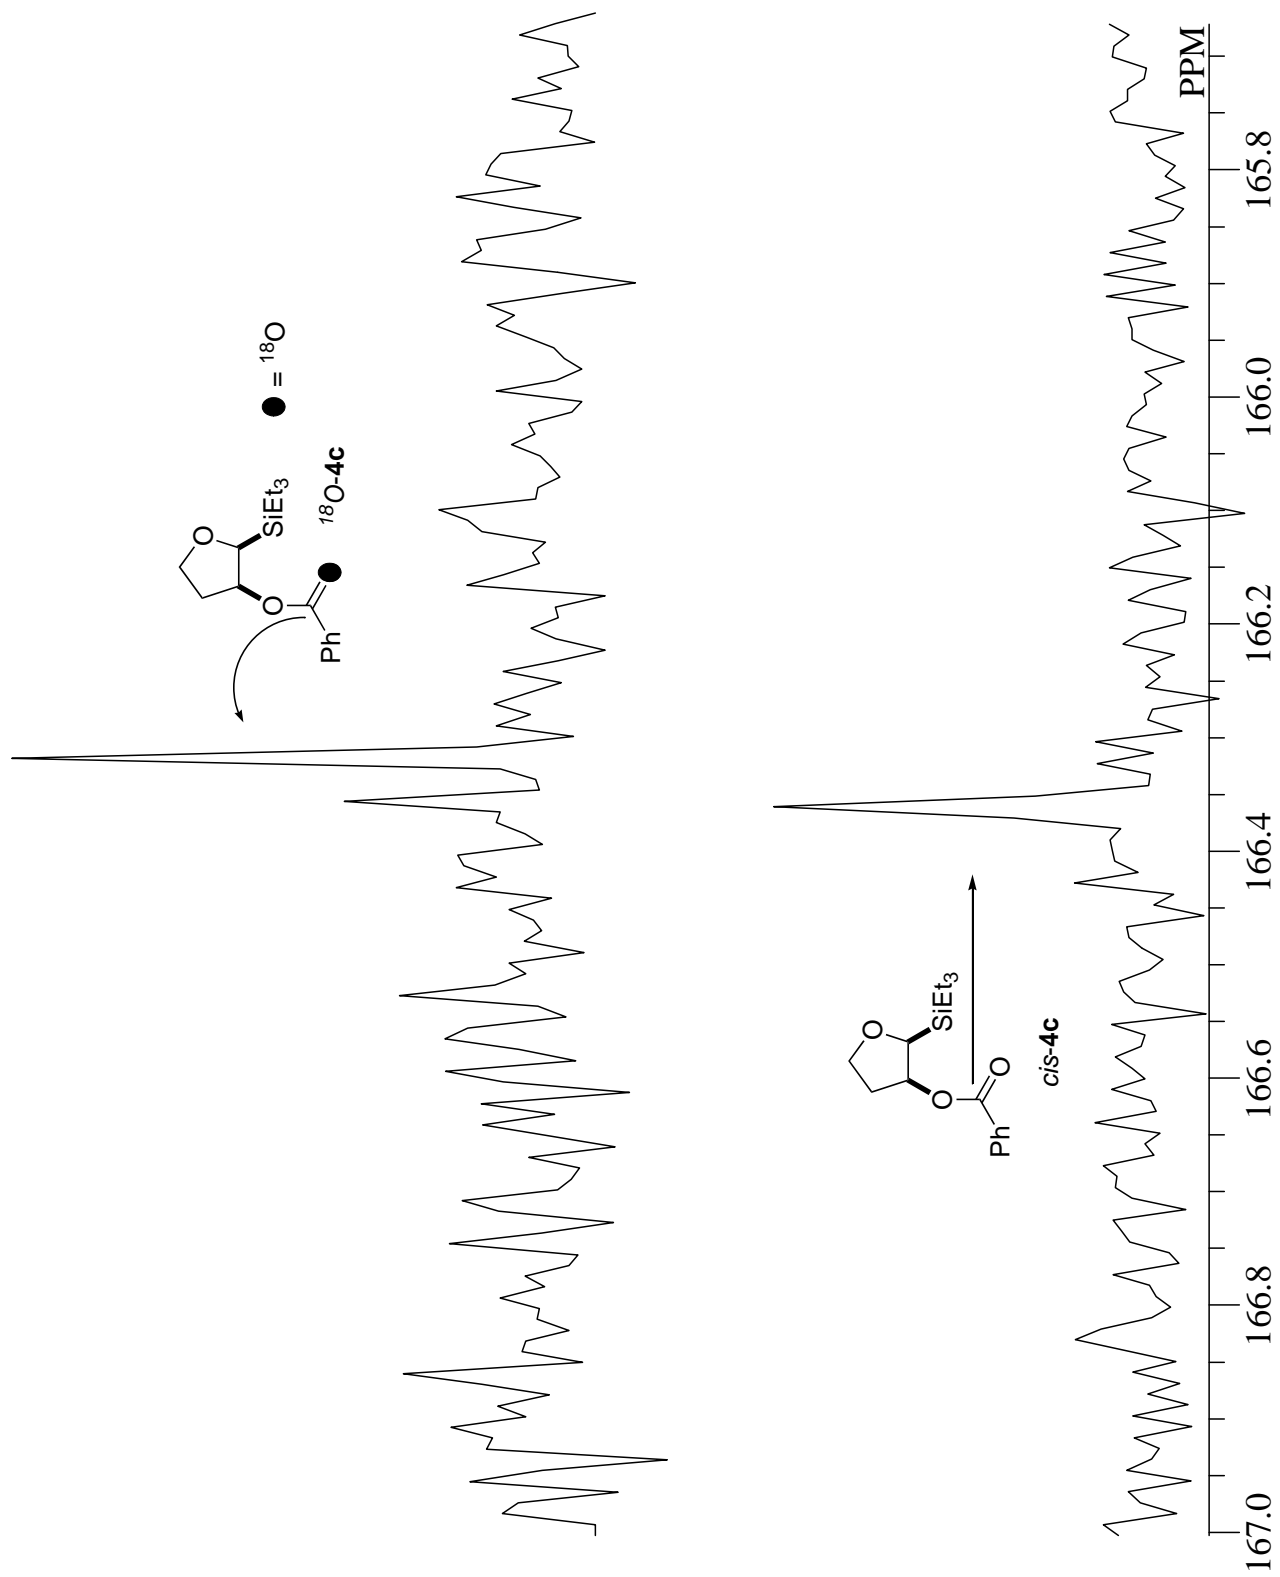

**Fig. S4**  $^{13}\text{C}$  NMR (150 MHz in  $\text{CDCl}_3$ ) signals of the ester carbonyl carbons in *cis*-4c and  $^{18}\text{O}$ -4c
